# Supplementary material for: Analysis of Infectious Complications after Thermal Ablation of Hepatocellular Carcinoma and the Impact on Long-Term Survival
Source: MDPI journal article supplement (doi:10.3390/cancers14215198), 2022-10-23
Supplement: s1 [file s1]

**Supplemental Data****Table S1** Baseline characteristics of infection in mild and severe patients

|                                               | Mild Infection<br>(41 patients) | Severe Infection<br>(8 patients) | P Value |
|-----------------------------------------------|---------------------------------|----------------------------------|---------|
| Age (years)                                   | 58.2±13.0                       | 63.8±10.9                        | 0.267   |
| Gender (M/F)                                  | 85.4%(35/6)                     | 100.0%(8/0)                      | 0.571   |
| Hepatic Cirrhosis(Y/N)                        | 85.4%(35/6)                     | 100.0%(8/0)                      | 0.571   |
| Diabetes(Y/N)                                 | 29.3%(12/29)                    | 12.5%(1/7)                       | 0.586   |
| HBsAg (+)(Y/N)                                | 87.8%(36/5)                     | 87.5%(7/1)                       | 1.000   |
| Child-Pugh class                              |                                 |                                  | 1.000   |
| A                                             | 92.7%(38)                       | 100%(8)                          |         |
| B                                             | 7.3%(3)                         | 0%(0)                            |         |
| Alanine aminotransferase level(U/L)           | 36.9±28.3                       | 58.9±71.2                        | 0.416   |
| Aspartate aminotransferase Level(U/L)         | 47.6±55.3                       | 62.6±52.2                        | 0.483   |
| Total bilirubin Level(mg/dL)                  | 18.5±9.3                        | 35.1±50.2                        | 0.382   |
| Alpha- fetoprotein Level(ug/L)                | 1562.0±6887.2                   | 1337.2±2902.0                    | 0.929   |
| Thermal ablation type                         |                                 |                                  | 1.000   |
| Radiofrequency ablation                       | 92.7%(38)                       | 87.5%(7)                         |         |
| Microwave ablation                            | 7.3%(3)                         | 12.5%(1)                         |         |
| Tumor number                                  | 1.9±0.9                         | 1.9±0.9                          | 0.939   |
| Tumor size(maximum diameter)                  | 2.4±1.1                         | 1.9±0.6                          | 0.212   |
| Transcatheter arterial chemoembolization(Y/N) | 43.9%(18/23)                    | 12.5%(1/7)                       | 0.204   |

M: male; F: female. Y: yes; N: no. Data are expressed as mean ± s.d.

**Table S2** Univariate and multivariate COX regression analysis for OS.

| Characteristics          | Univariate analysis |         | Multivariate analysis |         |
|--------------------------|---------------------|---------|-----------------------|---------|
|                          | HR(95%CI)           | P value | HR(95%CI)             | P value |
| Age                      | 1.717(0.881-3.348)  | 0.113   |                       |         |
| < 60 yr                  |                     |         |                       |         |
| ≥ 60 yr                  |                     |         |                       |         |
| Gender                   | 1.934(0.462-8.098)  | 0.367   |                       |         |
| Male                     |                     |         |                       |         |
| Female                   |                     |         |                       |         |
| Hepatic Cirrhosis        | 1.202(0.367-3.930)  | 0.761   | 0.467(0.125-1.743)    | 0.257   |
| No                       |                     |         |                       |         |
| Yes                      |                     |         |                       |         |
| HBsAg (+)                | 0.290(0.350-1.685)  | 0.425   |                       |         |
| No                       |                     |         |                       |         |
| Yes                      |                     |         |                       |         |
| Child-Pugh class         | 3.179(1.100-9.185)  | 0.033*  | 4.317(1.425-13.078)   | 0.010*  |
| A                        |                     |         |                       |         |
| B                        |                     |         |                       |         |
| Diabetes                 | 0.992(0.448-2.393)  | 0.984   | 1.064(0.475-2.383)    | 0.880   |
| No                       |                     |         |                       |         |
| Yes                      |                     |         |                       |         |
| Alpha-fetoprotein (ug/L) | 3.633(1.774-7.441)  | 0.000*  | 4.746(2.118-10.632)   | 0.000*  |
| < 20                     |                     |         |                       |         |
| ≥ 20                     |                     |         |                       |         |
| Thermal ablation type    | 0.584(0.140-2.44)   | 0.461   |                       |         |
| Radiofrequency ablation  |                     |         |                       |         |
| Microwave ablation       |                     |         |                       |         |
| Postoperative infection  | 1.356(0.697-2.637)  | 0.369   | 1.410(0.719-2.766)    | 0.318   |
| No                       |                     |         |                       |         |
| Yes                      |                     |         |                       |         |

\*Significant difference.
